# Supplementary material
Source: HighWire-hosted journal article supplement (https://cmaj.ca/highwire/filestream/58823/field_highwire_adjunct_files/0/Dumont_Letter.pdf)
Supplement: Dumont_Letter.pdf [file Dumont_Letter.pdf]

**Appendix 1** Percentage of women experiencing an unintended pregnancy during the first year of typical use and the first year of perfect use of contraception, and the percentage continuing use at the end of the first year. United States.

| Method<br>(1)                         | % of Women Experiencing an Unintended Pregnancy within the First Year of Use |                                 | % of Women Continuing Use at One Year <sup>3</sup> |
|---------------------------------------|------------------------------------------------------------------------------|---------------------------------|----------------------------------------------------|
|                                       | Typical Use <sup>1</sup><br>(2)                                              | Perfect Use <sup>2</sup><br>(3) | (4)                                                |
| No method <sup>4</sup>                | 85                                                                           | 85                              |                                                    |
| Spermicides <sup>5</sup>              | 28                                                                           | 18                              | 42                                                 |
| Fertility awareness-based methods     | 24                                                                           |                                 | 47                                                 |
| Standard Days method <sup>6</sup>     |                                                                              | 5                               |                                                    |
| TwoDay method <sup>6</sup>            |                                                                              | 4                               |                                                    |
| Ovulation method <sup>6</sup>         |                                                                              | 3                               |                                                    |
| Symptothermal method <sup>6</sup>     |                                                                              | 0.4                             |                                                    |
| Withdrawal                            | 22                                                                           | 4                               | 46                                                 |
| Sponge                                |                                                                              |                                 | 36                                                 |
| Parous women                          | 24                                                                           | 20                              |                                                    |
| Nulliparous women                     | 12                                                                           | 9                               |                                                    |
| Condom <sup>7</sup>                   |                                                                              |                                 |                                                    |
| Female (fc)                           | 21                                                                           | 5                               | 41                                                 |
| Male                                  | 18                                                                           | 2                               | 43                                                 |
| Diaphragm <sup>8</sup>                | 12                                                                           | 6                               | 57                                                 |
| Combined pill and progestin-only pill | 9                                                                            | 0.3                             | 67                                                 |
| Evra patch                            | 9                                                                            | 0.3                             | 67                                                 |
| NuvaRing                              | 9                                                                            | 0.3                             | 67                                                 |
| Depo-Provera                          | 6                                                                            | 0.2                             | 56                                                 |
| Intrauterine contraceptives           |                                                                              |                                 |                                                    |
| ParaGard (copper T)                   | 0.8                                                                          | 0.6                             | 78                                                 |
| Mirena (LNg)                          | 0.2                                                                          | 0.2                             | 80                                                 |
| Implanon                              | 0.05                                                                         | 0.05                            | 84                                                 |
| Female sterilization                  | 0.5                                                                          | 0.5                             | 100                                                |
| Male sterilization                    | 0.15                                                                         | 0.10                            | 100                                                |

Used with permission. Trussell J. Contraceptive efficacy. In: Hatcher RA, Trussell J, Nelson AL, Cates W, Kowal D, Policar M. *Contraceptive technology: Twentieth Revised Edition*. New York (NY): Ardent Media, 2011. p. 52.

Appendix to: Dumont T, Black A: Pregnancy and isotretinoin therapy. *CMAJ* 2013.

DOI:10.1503/cmaj.1132111.

Copyright © 2013 The Author(s) or their employer(s).

To receive this resource in an accessible format, please contact us at  
cmajgroup@cmaj.ca.
